# Supplementary material
Source: Springer Nature journal article supplement (https://www.springerprofessional.de/resource/supplementary/13638_2013_894_MOESM2_ESM.pdf/11899122)
Supplement: MOESM2 [file 11899122]

## Optimal route selection in CAIR

Procedure 1 : Route Discovery

Inputs : ID of Source node S and destination node D

Outputs : optimal route from source to destination

Begin

if (  $ID_D = ID_N$  )

    forward packet to D;

else

    determine the rectangle restricted searching area;

$S_{\text{searching\_area}} = [X_{\text{min}}, X_{\text{max}}, Y_{\text{min}}, Y_{\text{max}}]$ ;

    broadcast RREQ to D in the  $S_{\text{searching\_area}}$ ;

    Activate (BROADCAST\_TIMER);

    calculate route probability of connectivity and  
    packet delay;

    if (  $p_{\text{max}} - p_{\text{other}} > \epsilon$  )

        return route with the probability of  
        connectivity  $p_{\text{max}}$ ;

    else

        delete routes with the probability of  
        conectivity  $p_{\text{other}} < p_{\text{max}} - P_{\text{threshold}}$ ;  
        return route with packet delay  $d_{\text{min}}$ ;

    end if

end if

End of Route Discovery
